# Supplementary material
Source: PubMed Central journal article supplement (PMC4491996)

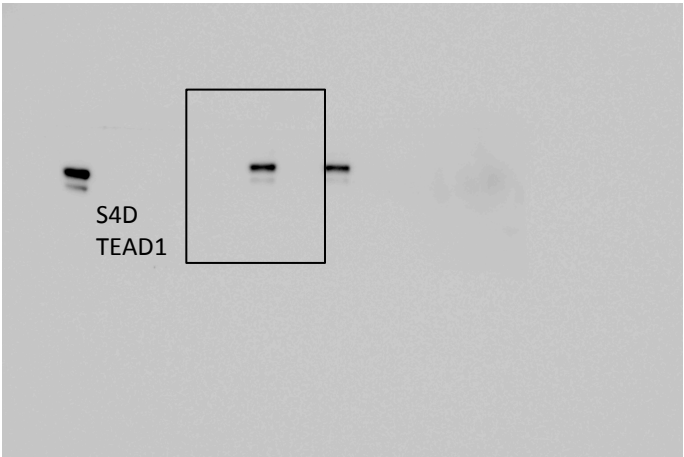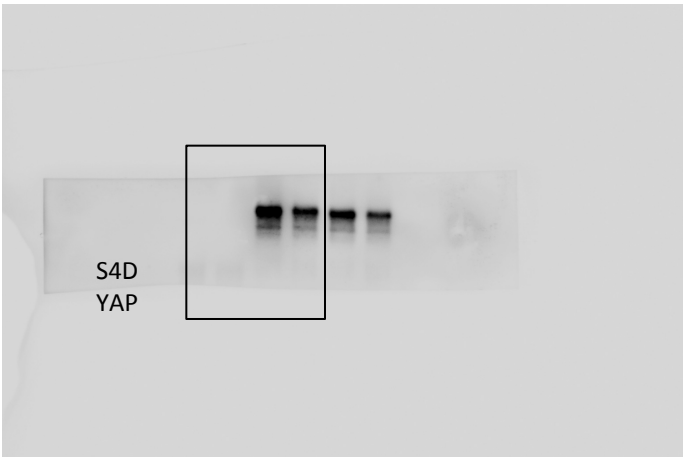

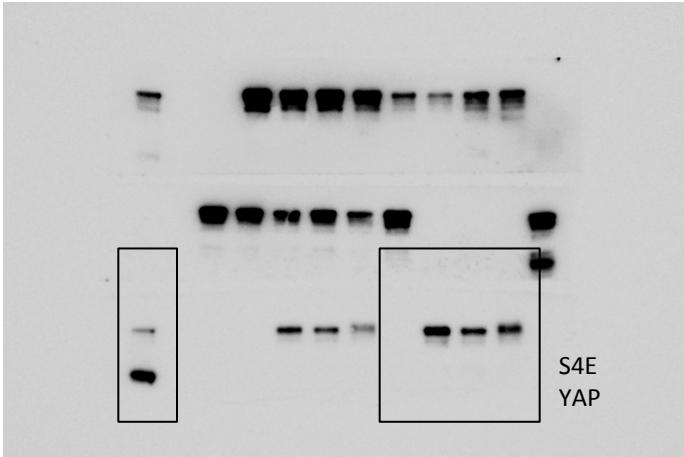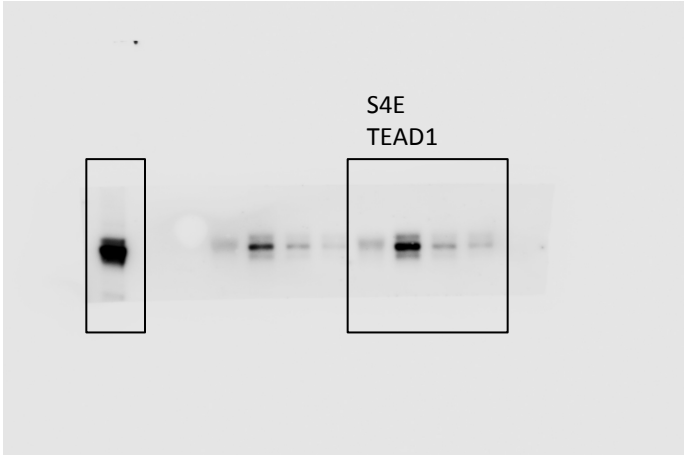

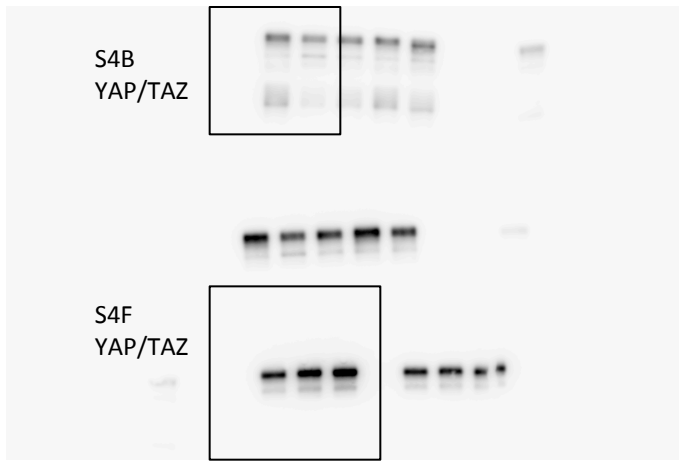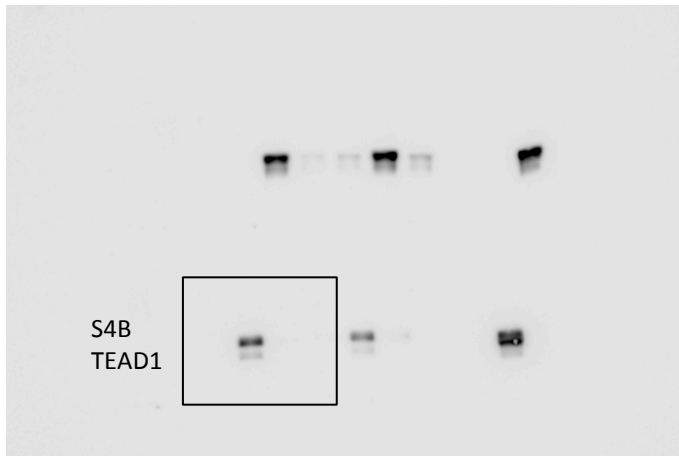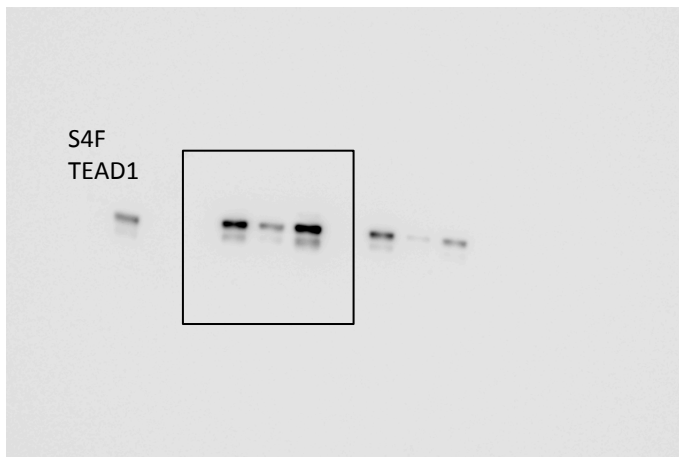

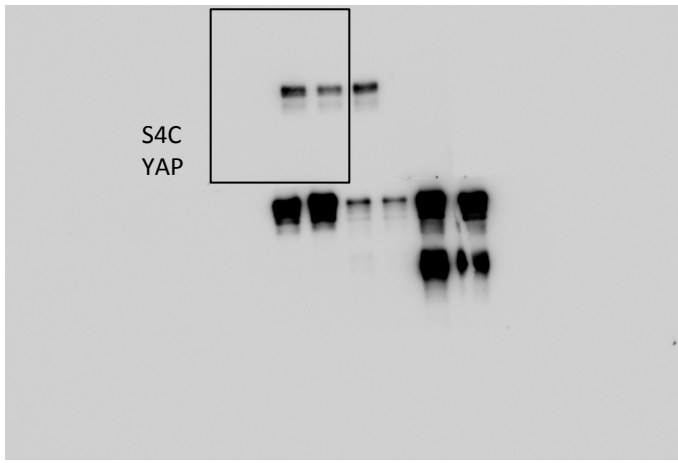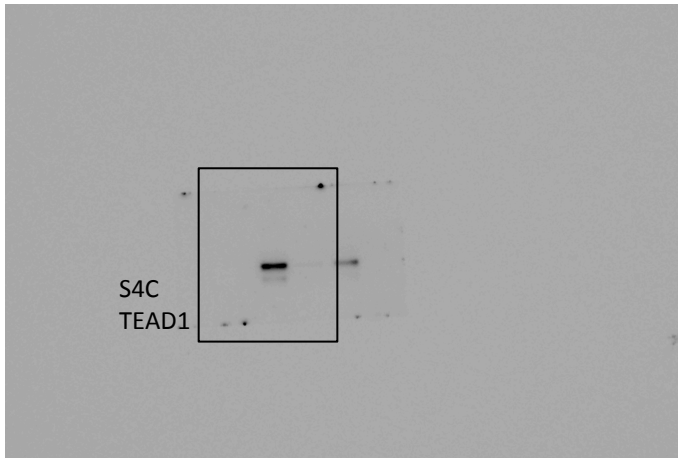

Supplement: embj0034-1349-sd16.pdf [file embj0034-1349-sd16.pdf]

3J  
FLAG-PFK1

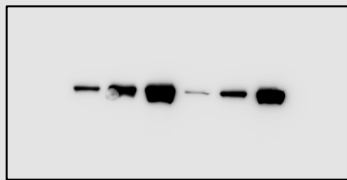

3J  
MYC-TEAD4

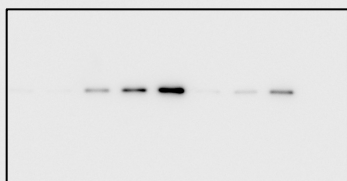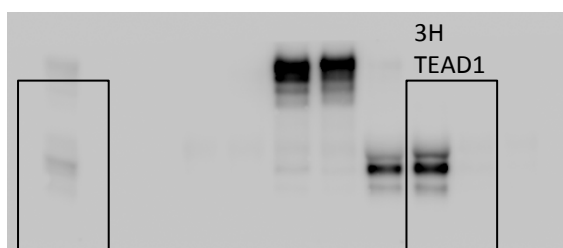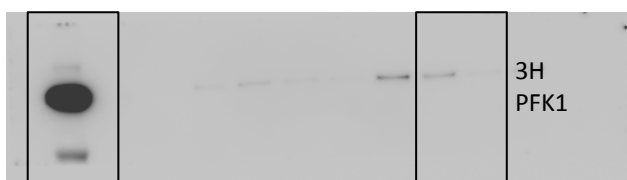

Supplement: embj0034-1349-sd18.pdf [file embj0034-1349-sd18.pdf]

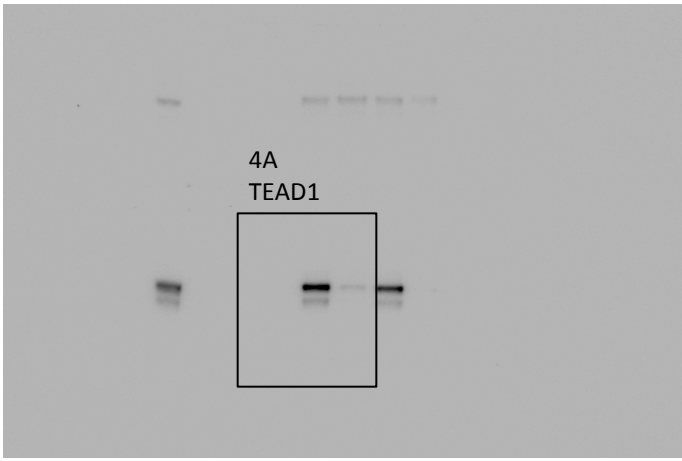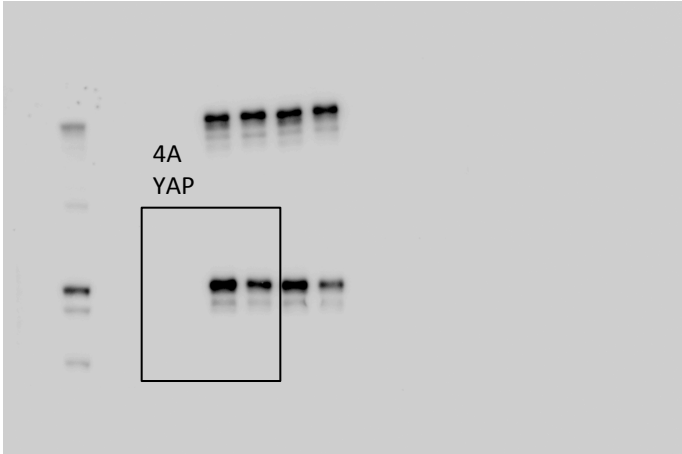

4B  
YAP/TAZ

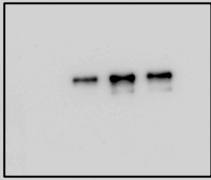

4B  
TEAD1

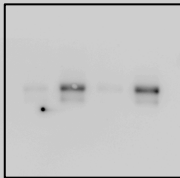

4D  
TEAD1

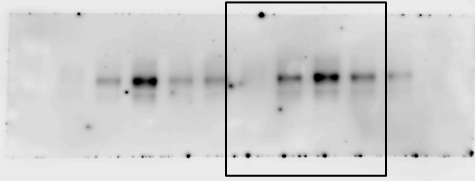

4D  
YAP

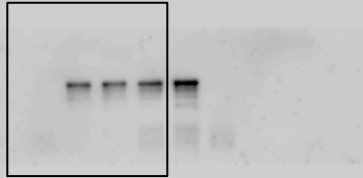

Supplement: embj0034-1349-sd19.pdf [file embj0034-1349-sd19.pdf]
